# Supplementary material for: Molecular Biomarkers in Perthes Disease: A Review
Source: MDPI journal article supplement (doi:10.3390/diagnostics13030471), 2023-01-27
Supplement: s1 [file s1]

## Supplementary material

CLUSTAL O(1.2.4) multiple sequence alignment

|      |        |              |                                                                                                                                     |     |
|------|--------|--------------|-------------------------------------------------------------------------------------------------------------------------------------|-----|
| SP   | P02458 | CO2A1_HUMAN  | MIRLGAPQTLVLL---TLLVAAVLRCQG-QDVQEAGSCVQDQGRYNDKDVWVKPEPCRICV                                                                       | 56  |
| SP   | P28481 | CO2A1_MOUSE  | MIRLGAPQSLVLL--TLLIAAVLRCQG-QDAQEAGSCLQNGQRYDKDKDVWKPSSCRICV                                                                        | 56  |
| SP   | Q91717 | CO2A1_XENLA  | MFSFVDSRTLVLFAATQVILLAVVRCQDEEDVLDTGSCVQHGRYSDDKDVWKPEPCQICV                                                                        | 60  |
| TR   | Q2LDA1 | Q2LDA1_DANRE | MFRL LDSRT LLLL VATHSVLLSLVR CQQEDD QEEFGGCVQD GQQYADRA VWKPEPCRV CV<br>*: : ::*: *: : :*: ** : * : *. *. *. *. * *: ****. *: **: * | 60  |
| <br> |        |              |                                                                                                                                     |     |
| SP   | P02458 | CO2A1_HUMAN  | CDTGTVLCCDDI ICEDVKDCLSPEIPFGECCPICPTDLAT-ASGQPGPKGQKGEPGD IKDI                                                                     | 115 |
| SP   | P28481 | CO2A1_MOUSE  | CDTGNVLCDDI ICED-PDCLNPEIPFGECCPICPADLAT-ASGKLGP KGQKGEPGD I RDI                                                                    | 114 |
| SP   | Q91717 | CO2A1_XENLA  | CDTGTVLCCDDI ICEESKD CPNAEIPFGECCPICPTEQSSTSSGQGV LKGQKGEPGD IKDV                                                                   | 120 |
| TR   | Q2LDA1 | Q2LDA1_DANRE | CDSGTVLCDEVICEDLNDCANPIISPGECCPICPADTDD-PIGSLGAKGQKGEPGDITDV<br>**:. *. *****.:***: ** . * *****.: : *. ***** **:                   | 119 |
| <br> |        |              |                                                                                                                                     |     |
| SP   | P02458 | CO2A1_HUMAN  | VGPKGPPPGPQG PAGEQGPRGDRGDKGEKGAPGPRGRDGEPGTPGNPGPPGPPGPPGGL                                                                        | 175 |
| SP   | P28481 | CO2A1_MOUSE  | IGPRGPPPGPQG PAGEQGPRGDRGDKGEKGAPGPRGRDGEPGTPGNPGPAGPPGPPGPPGGL                                                                     | 174 |
| SP   | Q91717 | CO2A1_XENLA  | LGPRGPPPGPQGPSGEQGSRG ERGDKGEKGAPGPRGRDGEPGTPGNPGPV--GPPGPPGGL                                                                      | 177 |
| TR   | Q2LDA1 | Q2LDA1_DANRE | VGPRGPAGPMGPPGEQGT RGERGA KGEKSGPGRGRDGEPGTPGNPGPPGPPGPN GPPGGL<br>: **. ** ** ** ***** **: ** *****:***** ***** ** *****           | 179 |
| <br> |        |              |                                                                                                                                     |     |
| SP   | P02458 | CO2A1_HUMAN  | G-GNFAAQ MAGGFDEKAGGAQLGVMQGPMGMPGRGPPG PAGAPGPQG FQGNPGEPEGEPG                                                                     | 234 |
| SP   | P28481 | CO2A1_MOUSE  | SAGNFAAQ MAGGYDEKAGGAQMGMVMQGPMGMPGRGPPG PAGAPGPQG FQGNPGEPEGEPG                                                                    | 234 |
| SP   | Q91717 | CO2A1_XENLA  | G-GNFAAQMTGGFDEKAGGAQMGMVMQGPMGMPGRGPPG PTGAPGPQG FQGNPGEPEGEPG                                                                     | 236 |
| TR   | Q2LDA1 | Q2LDA1_DANRE | G-GNFAAQ MAGGFDEKAGGAQMGMVMQGPMGMPGRGPPG PSGAPGPQG FQGNPETGEPEG<br>. *****.: **: *****.:***** *****.:***** ***** *                  | 238 |
| <br> |        |              |                                                                                                                                     |     |
| SP   | P02458 | CO2A1_HUMAN  | VSGPMGPRGPPGPPGKPGDDGEAGKPGKAGERGPPGPQGARGFP GT PGLPGVKGHRYPG                                                                       | 294 |
| SP   | P28481 | CO2A1_MOUSE  | VSGPMGPRGPPG PAGKPGDDGEAGKPGKSGERGLPG PQARGFP GT PGLPGVKGHRYPG                                                                      | 294 |
| SP   | Q91717 | CO2A1_XENLA  | AGGPMGPRGPPGPSGKPGDDGEAGKPGKSGERGPPGPQGARGFP GT PGLPGVKGHRYPG                                                                       | 296 |
| TR   | Q2LDA1 | Q2LDA1_DANRE | PAGALGPRGPPGPPGKPGSDGEAGKPGKAGERGPPGPQGARGFP GT PGLPGIKGHRHHPG                                                                      | 298 |

```

      . * :***** *****.*****:***** *****:*****:***

SP|P02458|CO2A1_HUMAN|LDGAKGEAGAPGVKGESGSPGENSGSPGPMGPRGLPGERGRTGPAGAAGARGNDGQPGPAG|354
SP|P28481|CO2A1_MOUSE|LDGAKGEAGAPGVKGESGSPGENSGSPGPMGPRGLPGERGRTGPAGAAGARGNDGQPGPAG|354
SP|Q91717|CO2A1_XENLA|LDGAKGEAGAAGAKGEGGATGEAGSPGPMGPRGLPGERGRPGSSGAAGARGNDGLPGPAG|356
TR|Q2LDA1|Q2LDA1_DANRE|LDGAKGEAGAAGAKGEAGSNGESGAPGPMGPRGLPGERGRPGATGAAGARGNDGLPGPAG|358
***** * .***. *: ** *:***** * :***** *****

SP|P02458|CO2A1_HUMAN|PPGPVGPAGGPGFPGAPGAKGEAGPTGARGPEGAQGGPRGEPGTPGSPGPAGASGNPGTDG|414
SP|P28481|CO2A1_MOUSE|PPGPVGPAGGPGFPGAPGAKGEAGPTGARGPEGAQGSRGEPGNPGSPGPAGASGNPGTDG|414
SP|Q91717|CO2A1_XENLA|PPGPVGPAGAPGFPAGPSKGEAGPTGARGPEGAQGPRGESGTPGSPGPAGASGNPGTDG|416
TR|Q2LDA1|Q2LDA1_DANRE|PPGPVGPAGAPGFPSPGSKGEAGPTGARGPEGAQGPRGEAGTPGSPGPAGASGNPGTDG|418
***** .*****:***:***** ***** ** *.*****

SP|P02458|CO2A1_HUMAN|IPGAKGSAGAPGIAGAPGFPGRGPPGPQGATGPLGPKGQTGEPIAGFKGEQGPKEGEPG|474
SP|P28481|CO2A1_MOUSE|IPGAKGSAGAPGIAGAPGFPGRGPPGPQGATGPLGPKGQAGEPIAGFKGDQGPKEGETG|474
SP|Q91717|CO2A1_XENLA|IPGAKGSSGGPIAGAPGFPGRGPPGPQGATGPLGPKGQTGDPGVAGFKGEQGPKEIG|476
TR|Q2LDA1|Q2LDA1_DANRE|IPGAKGSAGASGIAGAPGFPGRGPPGPQGATGPLGPKGQSGDPGIPGFKGEAGPKGERG|478
*****:*. *****:***:*****:****:***** *

SP|P02458|CO2A1_HUMAN|PAGPQAGAPGAGEEGKRGARGEPPGVPIGPPGERGAPGNRGFPQGDLGAPKGPAGERG|534
SP|P28481|CO2A1_MOUSE|PAGPQAGAPGAGEEGKRGARGEPPGAGPIGPPGERGAPGNRGFPQGDLGAPKGPAGERG|534
SP|Q91717|CO2A1_XENLA|SAGPQAGAPGAGEEGKRGARGEPPGAAGPNPGERGAPGNRGFPQGDLGAPKGPAGERG|536
TR|Q2LDA1|Q2LDA1_DANRE|VLGPQGPSPGSGEEGKRGRGEPGSAGPLGPPGERGAPGNRGFPQGDLGAPKGPAGDRG|538
**** ***:***** *****. ** ***** *****:***

SP|P02458|CO2A1_HUMAN|PSGLAGPKGANGDPGRPGEPGLPGARGLTGPRPDAGPQGVGSPGAPGEDGRPGPPGPQG|594
SP|P28481|CO2A1_MOUSE|PSGLTGPKGANGDPGRPGEPGLPGARGLTGPRPDAGPQGVGSPGAPGEDGRPGPPGPQG|594
SP|Q91717|CO2A1_XENLA|VPGLGGPKGNGDPGRPGEPGLPGARGLTGPRPDAGPQGVGSPGASGEDGRPGPPGPQG|596
TR|Q2LDA1|Q2LDA1_DANRE|VPGLSGPKGGTGDPGRPGEPGLPGARGLTGPRPDAGAQQGVGATGAPGEDGRPGPPGPLG|598
** ****.***** *****:*** ***** *

SP|P02458|CO2A1_HUMAN|ARGQPGVMGFPGPKGANGEPGKAGEKGLPGAPGLRGLPGKDGETGAAGPPGPAGPAGERG|654
SP|P28481|CO2A1_MOUSE|ARGQPGVMGFPGPKGANGEPGKAGEKGLAGAPGLRGLPGKDGETGAAGPPGPSGPAGERG|654
SP|Q91717|CO2A1_XENLA|ARGQPGVMGFPGPKGANGEPGKAGEKGLVGAPGLRGLPGKDGETGSQGPNGPAGPAGERG|656
TR|Q2LDA1|Q2LDA1_DANRE|ARGQPGVMGFPGPKGANGEPGKPEKGLVGRGTGLRGLPGKDGETGPSGPPGPVAVGERG|658
***** ***** * ***** ** ** * .****

SP|P02458|CO2A1_HUMAN|EQGAPGPSGFQGLPGPPGPPGEGGKPGDQGVPEAGAPGLVGPRGERGFPGERGSPGAQG|714
SP|P28481|CO2A1_MOUSE|EQGAPGPSGFQGLPGPPGPPGEGGKQGDQGIPEAGAPGLVGPRGERGFPGERGSPGAQG|714
SP|Q91717|CO2A1_XENLA|EQGPPGPSGFQGLPGPPGSPGEGGKPGDQGVPEAGAPGLVGPRGERGFPGERGSSGPQG|716

```

|    |        |              |                        |                           |                           |                                |                |
|----|--------|--------------|------------------------|---------------------------|---------------------------|--------------------------------|----------------|
| TR | Q2LDA1 | Q2LDA1_DANRE | EQGQPGPSGFQGLPGPTGAPGE | PGKPGDQGV                 | PEGGAAGPTGPRGERGF         | PGERGGAGPQG                    | 718            |
|    |        |              | ***                    | *****                     | * **                      | ***:***.* *                    | *****.* **     |
|    |        |              |                        |                           |                           |                                |                |
| SP | P02458 | CO2A1_HUMAN  | LQGPRGLPGT             | PGTDGPKGASG               | PAGPPGAQGPPGLQ            | GMPGERGAAGIAGPKGDRGDVGEKG      | 774            |
| SP | P28481 | CO2A1_MOUSE  | LQGPRGLPGT             | PGTDGPKGAAGPDGPPGAQGPPGLQ | GMPGERGAAGIAGPKGDRGDVGEKG |                                | 774            |
| SP | Q91717 | CO2A1_XENLA  | LQGPRGLPGT             | PGTDGPKGASGPSGPNQAQGPPGLQ | GMPGERGAAGISGPKGDRGDTGEKG |                                | 776            |
| TR | Q2LDA1 | Q2LDA1_DANRE | LQGPRGLPGT             | PGTDGPKGAI                | GPAGAAGQGPPGLQ            | GMPGERGAVGISGAKGDRGDSGEKG      | 778            |
|    |        |              | *****                  | *****                     | ** *                      | *****.**:*                     | ***** ****     |
|    |        |              |                        |                           |                           |                                |                |
| SP | P02458 | CO2A1_HUMAN  | PEGAPGKDGG             | RGLTGPIGPPG               | PAGANGEKGEV               | GPPGPAGSAGARGAPGERGETGPPGPAG   | 834            |
| SP | P28481 | CO2A1_MOUSE  | PEGAPGKDGG             | RGLTGPIGPPG               | PAGANGEKGEV               | GPPGPSGTGARGAPGERGETGPPGPAG    | 834            |
| SP | Q91717 | CO2A1_XENLA  | PEGASGKDG              | SRGLTGPIGPPG              | PAGPNGEKGESG              | PSGPPGIVGARGAPGDRGENGPPGPAG    | 836            |
| TR | Q2LDA1 | Q2LDA1_DANRE | PEGAPGKDG              | SRGLTGPIGPPG              | PSGPNKAKGETGPI            | GSIGAPGARGAPGDRGEIGAPGPAG      | 838            |
|    |        |              | ****                   | ****                      | *****.*                   | ** *** ** *                    | * *****.* ** * |
|    |        |              |                        |                           |                           |                                |                |
| SP | P02458 | CO2A1_HUMAN  | FAGPPGADGQ             | PGAKGEQGEAGQ              | KGDAGAPGPQG               | PSGAPGPQGPTGVTGPKGARGAQGPPG    | 894            |
| SP | P28481 | CO2A1_MOUSE  | FAGPPGADGQ             | PGAKGDQGEAGQ              | KGDAGAPGPQG               | PSGAPGPQGPTGVTGPKGARGAQGPPG    | 894            |
| SP | Q91717 | CO2A1_XENLA  | FAGPPGADGQ             | SGLKGDQGESGQ              | KGDAGAPGPQG               | PSGAPGPQGPTGVFGPKGARGAQGPAG    | 896            |
| TR | Q2LDA1 | Q2LDA1_DANRE | FAGPPGADGQ             | PGNKGEQGESGQ              | KDGSAGGPQG                | PSGAPGPVGPTGVTGPKGARGAQGAPG    | 898            |
|    |        |              | *****                  | *                         | **.***.*                  | *****.*                        | ***** *        |
|    |        |              |                        |                           |                           |                                |                |
| SP | P02458 | CO2A1_HUMAN  | ATGFPGAAGR             | VGPPGPNPGPP               | PGPSGKDGPKG               | ARGDSGPPGRAGEPGLQGPAGPPG       | 954            |
| SP | P28481 | CO2A1_MOUSE  | ATGFPGAAGR             | VGPPGANGNPG               | PAGPPGPAGKDG              | PKGVRGDSGPPGRAGDPGLQGPAGAPG    | 954            |
| SP | Q91717 | CO2A1_XENLA  | ATGFPGAAGR             | VGTPGPNNGPP               | PGPSAGKEGPKG              | VRGDAGPPGRAGDPGLQGAAGAPG       | 956            |
| TR | Q2LDA1 | Q2LDA1_DANRE | ATGFPGAAGR             | VGPPGPNNGPA               | AGPAGPSGKDG               | PKGVRGDAGPPGRAGDAGLRGPPGAPG    | 958            |
|    |        |              | *****                  | **                        | *****                     | ** *                           | :**.***.***.*  |
|    |        |              |                        |                           |                           |                                |                |
| SP | P02458 | CO2A1_HUMAN  | EKGEPGDDG              | PSGAEGPPGPQ               | GLAGQRGIVGLP              | QRGGERGFPLPGPSGEPGKQGAPGASG    | 1014           |
| SP | P28481 | CO2A1_MOUSE  | EKGEPGDDG              | PSGLDGPPGPQ               | GLAGQRGIVGLP              | QRGGERGFPLPGPSGEPGKQGAPGASG    | 1014           |
| SP | Q91717 | CO2A1_XENLA  | EKGEPGEDG              | PSGPDGPPGPQ               | GLSGQRGIVGLP              | QRGGERGFPLPGPSGEPGKQGGPGSSG    | 1016           |
| TR | Q2LDA1 | Q2LDA1_DANRE | EKGEAGEDG              | PPGPDGPSGPA               | GLAGQRGIVGLP              | QRGGERGFPLPGPSGEPGKQAGPGSSG    | 1018           |
|    |        |              | ****                   | *                         | :*** *                    | :** ** *                       | :*****.***.*   |
|    |        |              |                        |                           |                           |                                |                |
| SP | P02458 | CO2A1_HUMAN  | DRGPPGPVG              | PPGLTGPA                  | GEFGREGSPGADG             | PPGRDGAAGVKGDRGETGAVGAPGAPGPPG | 1074           |
| SP | P28481 | CO2A1_MOUSE  | DRGPPGPVG              | PPGLTGPA                  | GEFGREGSPGADG             | PPGRDGAAGVKGDRGETGALGAPGAPGPPG | 1074           |
| SP | Q91717 | CO2A1_XENLA  | DRGPPGPVG              | PPGLTGPSG                 | EPGREGNPGSDG              | PPGRDGATGIKGDRTGTGPLGAPGAPGAPG | 1076           |
| TR | Q2LDA1 | Q2LDA1_DANRE | DRGPPGPVG              | PPGLTGPA                  | GETGREGNPGSDG             | PPGRDGAAGVKGERGNTGPIGAPGAPGAPG | 1078           |
|    |        |              | *****                  | :**                       | ****.*                    | :*****.*                       | :**.***.*      |
|    |        |              |                        |                           |                           |                                |                |
| SP | P02458 | CO2A1_HUMAN  | SPGPAGPTG              | KQGDREAGAQ                | QPMGPSGPAGARGI            | QGPQGPGRGDKGEAGEPGERGLKGHRG    | 1134           |
| SP | P28481 | CO2A1_MOUSE  | SPGPAGPTG              | KQGDREAGAQ                | QPMGPSGPAGARGI            | AGPQGPGRGDKGESGEQGERGLKGHRG    | 1134           |

|    |        |              |                                                                                                                 |      |
|----|--------|--------------|-----------------------------------------------------------------------------------------------------------------|------|
| SP | Q91717 | CO2A1_XENLA  | APGSVGPTGKQGDRGESGPQGGLPGSPGAGARGLAGPQGPRGDKGEAGEAGERGQKGHRG                                                    | 1136 |
| TR | Q2LDA1 | Q2LDA1_DANRE | APGSVGPIGKQGDRGENGPQGAGPPGPAGARGMVGPQGPRGDKGEAGEAGERGQKGHRG<br>: ** . ** ***** * *** ** *****: *****: ** *****  | 1138 |
|    |        |              |                                                                                                                 |      |
| SP | P02458 | CO2A1_HUMAN  | FTGLQGLPGPPGPSGDQGASGPAGPSGPRGPPGPVGP                                                                           | 1194 |
| SP | P28481 | CO2A1_MOUSE  | FTGLQGLPGPPGPSGDQGASGPAGPSGPRGPPGPVGP                                                                           | 1194 |
| SP | Q91717 | CO2A1_XENLA  | FTGLQGLPGPPGSAGDQGATGPAGPAGPRGPPGPVGP                                                                           | 1196 |
| TR | Q2LDA1 | Q2LDA1_DANRE | FTGLQGLPGPPGPSGDQGAAGPAGPSGAKGPSGPVGP<br>***** *****:*****: * : ** *****:*****: ** *****                        | 1198 |
|    |        |              |                                                                                                                 |      |
| SP | P02458 | CO2A1_HUMAN  | ETGPAGPPGNPGPPGPPGPGIDMSAFAGLGPREKGPDP                                                                          | 1254 |
| SP | P28481 | CO2A1_MOUSE  | ETGPVGGPGSPGPPGPPGPGIDMSAFAGLGPREKGPDP                                                                          | 1254 |
| SP | Q91717 | CO2A1_XENLA  | ETGPSGPPGQPPGPPGPPGPGIDMSAFAGLSQPEKGPDP                                                                         | 1253 |
| TR | Q2LDA1 | Q2LDA1_DANRE | ESGPVGGPNPGPPGPPGPPGPGIDMSAFAGLSQPEKGPDP<br>*: ** *****:*****:*****: * . * . :                                  | 1258 |
|    |        |              |                                                                                                                 |      |
| SP | P02458 | CO2A1_HUMAN  | VDTLKSNNQIESIRSPESGRKNPARTCRDLKLCHPEWKS                                                                         | 1314 |
| SP | P28481 | CO2A1_MOUSE  | VDTLKSNNQIESIRSPDGRKNPARTCQDLKLCHPEWKS                                                                          | 1314 |
| SP | Q91717 | CO2A1_XENLA  | VEATLKSNNQIENIRSPDGTKKNPARTCRDLKLCHPEWKS                                                                        | 1313 |
| TR | Q2LDA1 | Q2LDA1_DANRE | VDTLKSINGQIEDIRSPDGRKNPARSCRDLKLCHPEWKS<br>*:*****:*.***.*****:*.*****:*****:*****:****.*: **:                  | 1318 |
|    |        |              |                                                                                                                 |      |
| SP | P02458 | CO2A1_HUMAN  | CNMETGETCVYPNPANVPKKNWSSKSKEKKHIWFGETING                                                                        | 1374 |
| SP | P28481 | CO2A1_MOUSE  | CNMETGETCVYPNPATVPRKNWSSKSKEKKHIWFGETING                                                                        | 1374 |
| SP | Q91717 | CO2A1_XENLA  | CDMETGETCVYPNPSPKIPKKNWWSAKGKEKKHIWFGETING                                                                      | 1373 |
| TR | Q2LDA1 | Q2LDA1_DANRE | CNMETGETCVKPSSTPKIPRKNWWSKSKAQKHVWFGESMNGG<br>*:***** * . . :*:*****:*. * :*:*****:*****:***. * . . :*. * . : * | 1378 |
|    |        |              |                                                                                                                 |      |
| SP | P02458 | CO2A1_HUMAN  | MTFLRLLSTEGSQNITYHCKNSIAYLDEAAGNLKKALLIQ                                                                        | 1434 |
| SP | P28481 | CO2A1_MOUSE  | MTFLRLLSTEGSQNITYHCKNSIAYLDEAAGNLKKALLIQ                                                                        | 1434 |
| SP | Q91717 | CO2A1_XENLA  | MTFLRLLSTDASQNITYHCKNSIAFMDEASGNLKKAVLLQ                                                                        | 1433 |
| TR | Q2LDA1 | Q2LDA1_DANRE | LNFLRLLSTEATQTITYHCKNSVAYMDQATGNLKKAILLQ<br>: . *****: . : *. *****:*. :*. :*. *****:*. :*****:***** * . *      | 1438 |
|    |        |              |                                                                                                                 |      |
| SP | P02458 | CO2A1_HUMAN  | KDGCTKHTGKWGKTVIEWRSQKTSRLPIIDIAPMDIGGPE                                                                        | 1487 |
| SP | P28481 | CO2A1_MOUSE  | KDGCTKHTGKWGKTVIEWRSQKTSRLPIIDIAPMDIGGAE                                                                        | 1487 |
| SP | Q91717 | CO2A1_XENLA  | EDGCKKHTGKWSKTVIEWRTQKTSRLPIVDIAPMDIGGAD                                                                        | 1486 |
| TR | Q2LDA1 | Q2LDA1_DANRE | EDGCKKHTGQWAKTVIEYKTQKTSRLPIMDIAPMDIGGAD<br>:***.*****:*. *****:*****:***** :***** *****                        | 1491 |

Protein sequence alignment of COL2A1 protein. COL2A1 proteins show high conservation of the primary structure among distant species. The figure shows CLUSTAL OMEGA (1.2.4) multiple sequence alignment of the regions of COL2A1 protein of different organisms: Human, Mus musculus, Xenopus laevis, and Danio rerio [Uniprot identifiers: P02458, P28481, Q91717, Q2LDA, respectively]. Highlighted amino acids show the mutations found in Perthes patients. c.638 G > A (p.Gly213Asp) (exon 9); c.2014 G > T (p.Gly672Cys) (exon 31) (NM\_001844.5) [50]; c.1888 G > A (p.Gly630Ser) (exon 29) (NM\_033150.3) [51]; c.3665 G > A (p.Gly1170Ser) (exon 50) (NM\_033150.3) [48,49].

48. Su, P.; Li, R.; Liu, S.; Zhou, Y.; Wang, X.; Patil, N.; Mow, C.S.; Mason, J.C.; Huang, D.; Wang, Y. Age at onset-dependent presentations of premature hip osteoarthritis, avascular necrosis of the femoral head, or Legg-Calvé-Perthes disease in a single family, consequent upon a p.Gly1170Ser mutation of COL2A1. *Arthritis Rheum.* **2008**, *58*, 1701–1706.
49. Miyamoto, Y.; Matsuda, T.; Kitoh, H.; Haga, N.; Ohashi, H.; Nishimura, G.; Ikegawa, S. A recurrent mutation in type II collagen gene causes Legg-Calvé-Perthes disease in a Japanese family. *Hum. Genet.* **2007**, *121*, 625–629. <https://doi.org/10.1007/s00439-007-0354-y>.
50. Kannu, P.; Irving, M.; Aftimos, S.; Savarirayan, R. Two Novel COL2A1 Mutations Associated with a Legg-Calvé-Perthes Disease-like Presentation. *Clin. Orthop. Relat. Res.* **2011**, *469*, 1785–1790. <https://doi.org/10.1007/s11999-011-1850-x>.
51. Li, N.; Yu, J.; Cao, X.; Wu, Q.-Y.; Li, W.-W.; Li, T.-F.; Zhang, C.; Cui, Y.-X.; Li, X.-J.; Yin, Z.-M.; et al. A novel p. Gly630Ser mutation of COL2A1 in a Chinese family with presentations of Legg-Calvé-Perthes disease or avascular necrosis of the femoral head. *PLoS ONE* **2014**, *9*, e100505.
